# Supplementary figures and images for: p53 Mediates Vast Gene Expression Changes That Contribute to Poor Chemotherapeutic Response in a Mouse Model of Breast Cancer
Source: PubMed Central journal article supplement — Transl Oncol. 2018 May 31;11(4):930–40. doi: 10.1016/j.tranon.2018.05.003 (PMC6041561; doi:10.1016/j.tranon.2018.05.003), 2018-05-31

Supplementary Figure 1

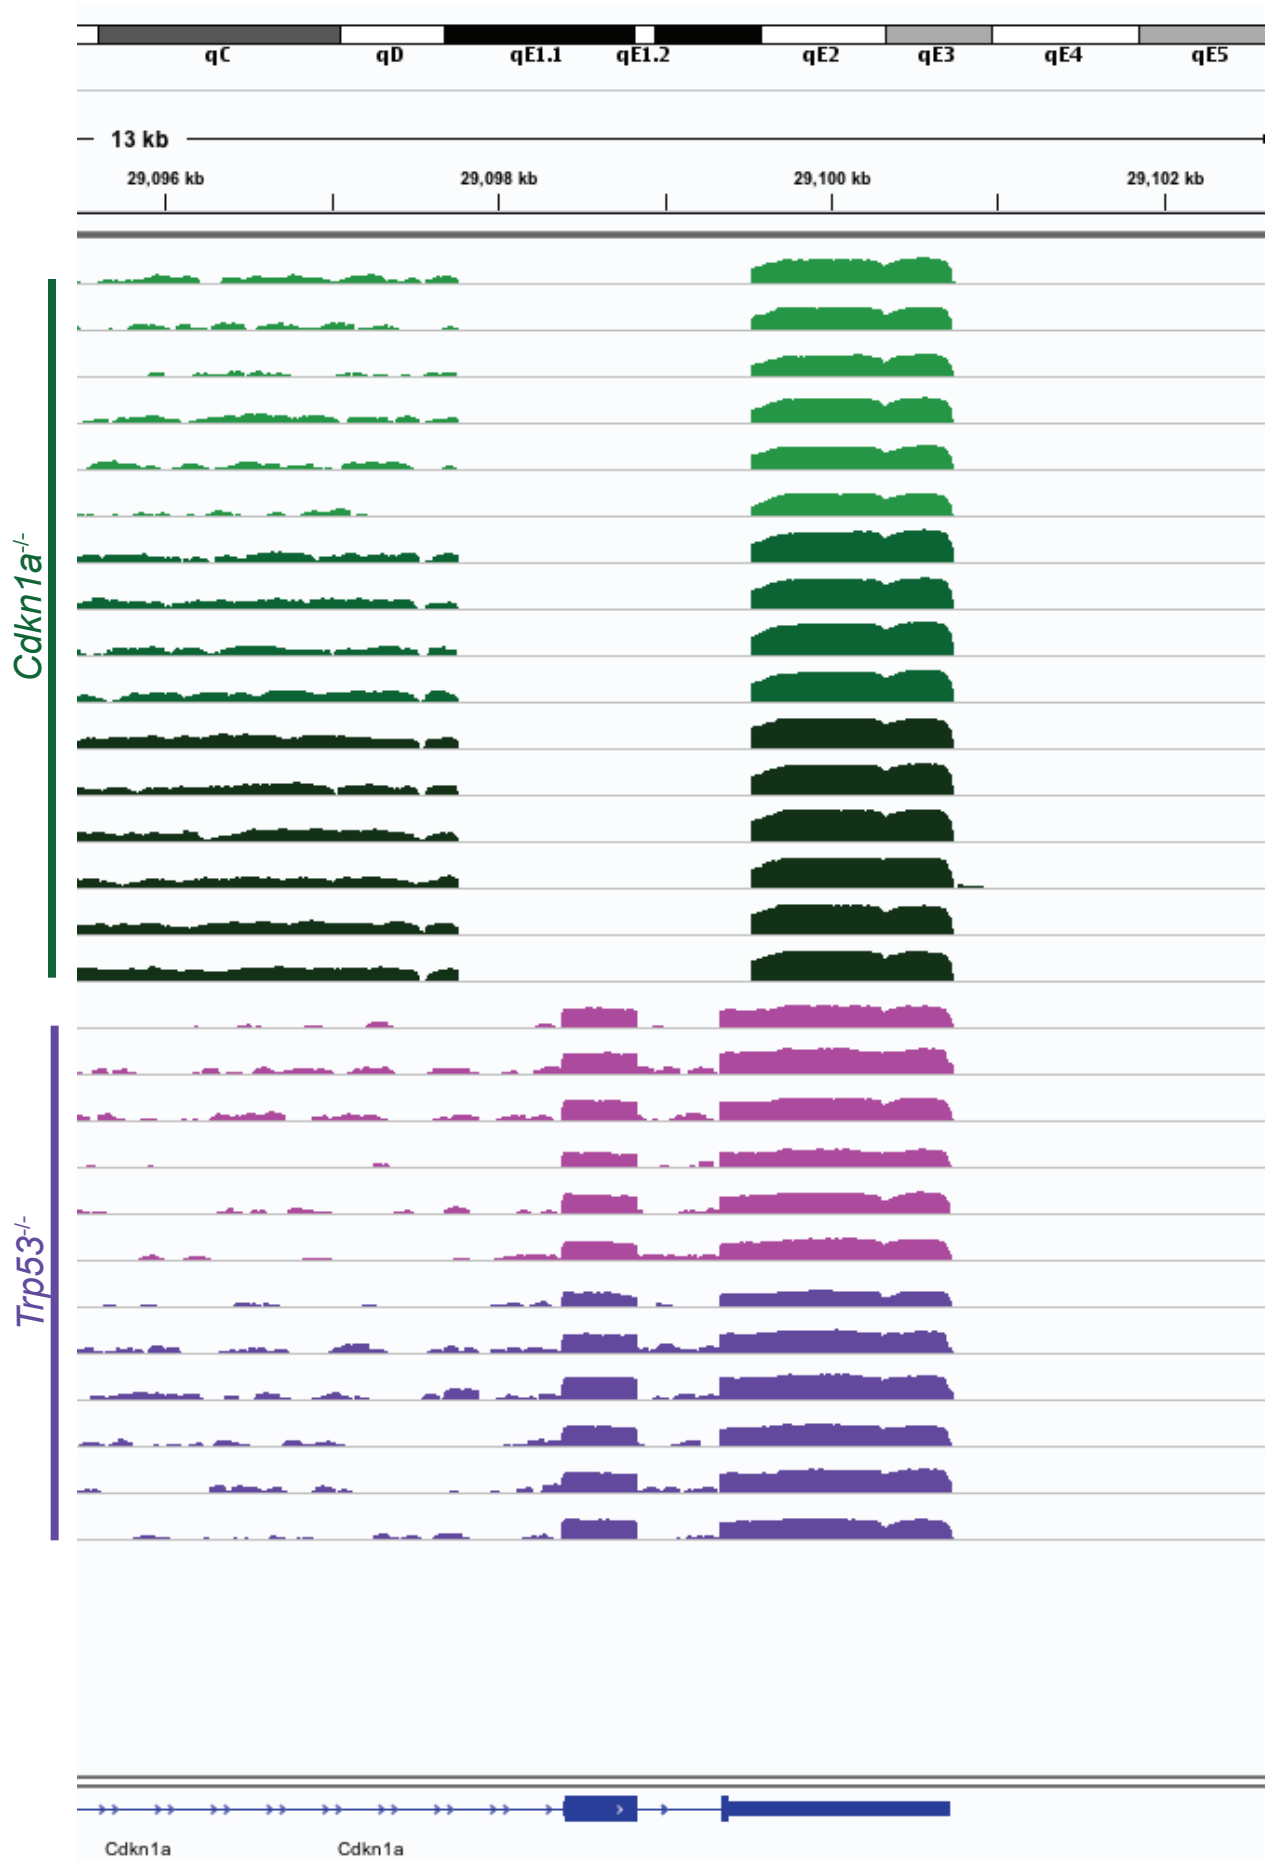

Supplement: mmc1.pdf [file mmc1.pdf]
